# Supplementary material
Source: ML conference proceedings conference paper supplement (https://proceedings.neurips.cc/paper_files/paper/2023/hash/6b7e1e96243c9edc378f85e7d232e415-Abstract.html)
Supplement: Supplementary file 1 [file 6b7e1e96243c9edc378f85e7d232e415-Supplemental-Conference.zip]

Archive with 1 entries (1 files):
- Causal_Context_Proofs.pdf
